# Supplementary material
Source: Springer Nature journal article supplement (http://www.springermedizin.de/resource/supplementary/12933_2012_555_MOESM1_ESM.pdf/9538434)
Supplement: MOESM1 [file 9538434]

■ Age < 60 years ■ Age 60-69 years ■ Age ≥ 70 years

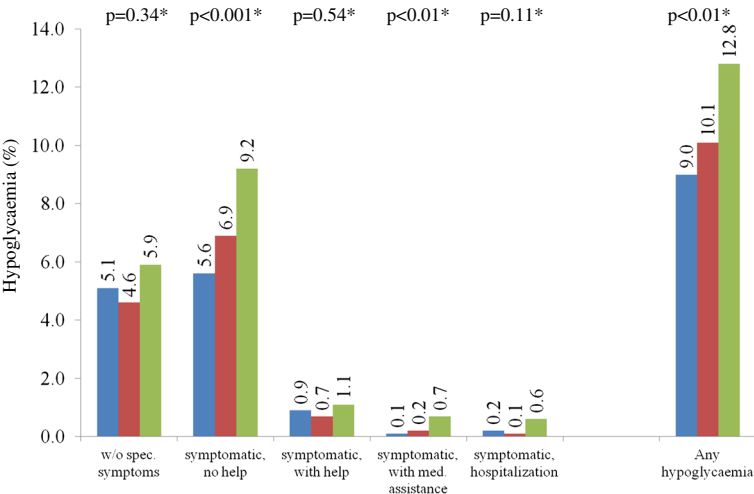

Ajusted OR\*\* for the comparison of pts ≥ 70 vs. < 60 years

OR 1.74  
(95%CI  
1.05-2.89)

OR 1.45  
(95%CI  
0.95-2.23)

OR 0.93  
(95%CI  
0.24-3.54)

OR 3.83  
(95%CI  
0.40-36.2)

OR 3.85  
(95%CI  
0.70-21.0)

OR 1.68  
(95%CI  
1.16-2.45)
